# Supplementary material for: Common Inherited Variation in Mitochondrial Genes Is Not Enriched for Associations with Type 2 Diabetes or Related Glycemic Traits
Source: PLOS journal article supplement (doi:10.1371/journal.pgen.1001058), 2010-08-12
Supplement: S7 (10.1371/journal.pgen.1001058.s007) [file journal.pgen.1001058.s007]

**Figure S7**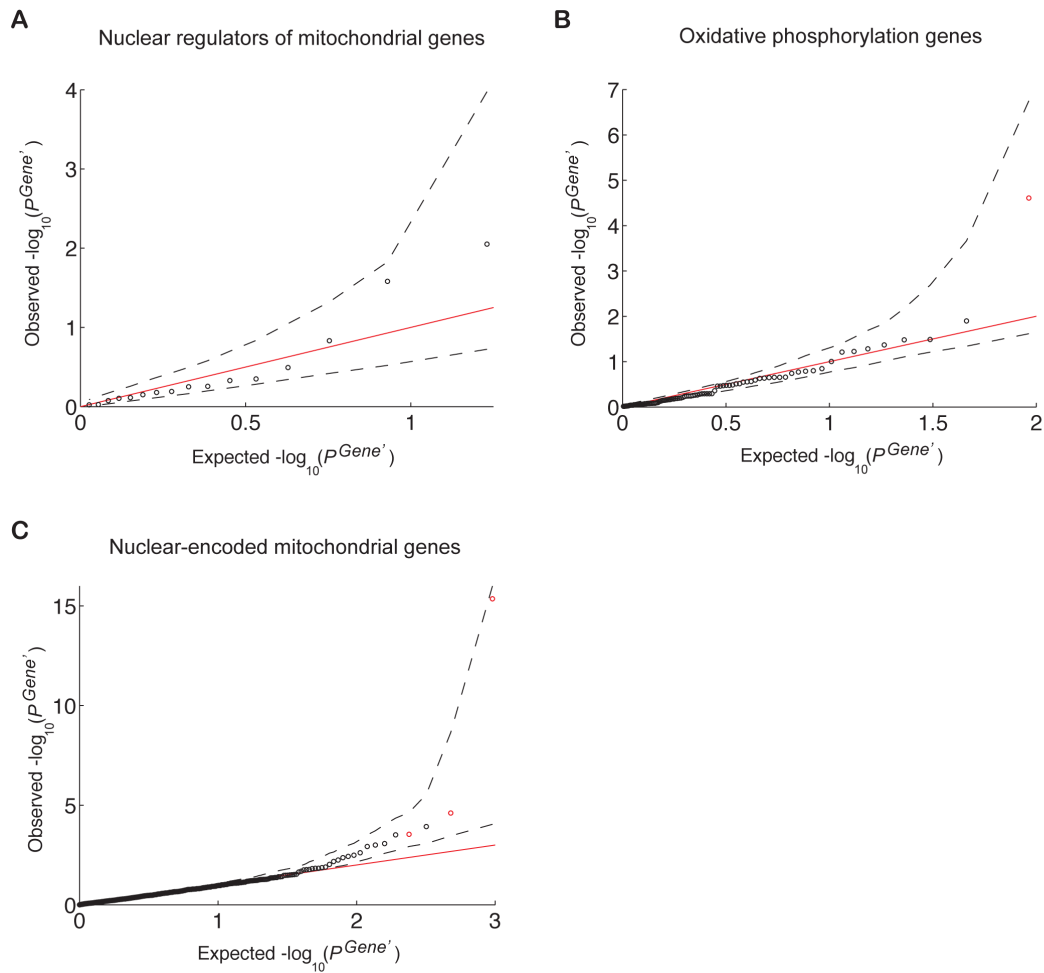

**Figure S7. Quantile-quantile plots of T2D gene association  $p$ -values for mitochondria-related gene sets.** The T2D gene association  $p$ -values adjusted for confounding effects using step-wise multivariate linear regression analysis,  $P_g^{Gene'}$  (see Materials and Methods) were plotted for (A) 16 nuclear regulators of mitochondrial genes, (B) 91 oxidative phosphorylation genes, and (C) all known nuclear-encoded autosomal mitochondrial genes with at least one SNP in their region (955 genes), as a function of their corresponding null distributions of  $P_g^{Gene'}$  assuming a uniform distribution. Three mitochondrial genes that lie near validated T2D SNPs, as of the most recent DIAGRAM+ T2D meta-analysis are labeled in red (*IDE*, *C8orf38*, and *ACADS*). The red line marks the diagonal, and the dashed lines represent 5% and 95% confidence

intervals estimated based on 1,000 randomly sampled gene sets from the genome of identical set size to the given gene set. All gene  $p$ -values lie within the non-parametric 95% confidence intervals. Similar results were obtained when the observed gene  $p$ -values were plotted against an expected distribution that was adjusted according to a non-parametric null distribution, generated based on 1,000 randomly sampled gene sets from the genome of identical size to that of the tested gene set (data not shown).  $P_g^{Gene'}$  is plotted on a  $-\log_{10}(p\text{-value})$  scale. Note the x and y-axes of the three plots are not on the same scale.
