# Supplementary material for: Common Inherited Variation in Mitochondrial Genes Is Not Enriched for Associations with Type 2 Diabetes or Related Glycemic Traits
Source: PLOS journal article supplement (doi:10.1371/journal.pgen.1001058), 2010-08-12
Supplement: S8 (10.1371/journal.pgen.1001058.s008) [file journal.pgen.1001058.s008]

**Figure S8**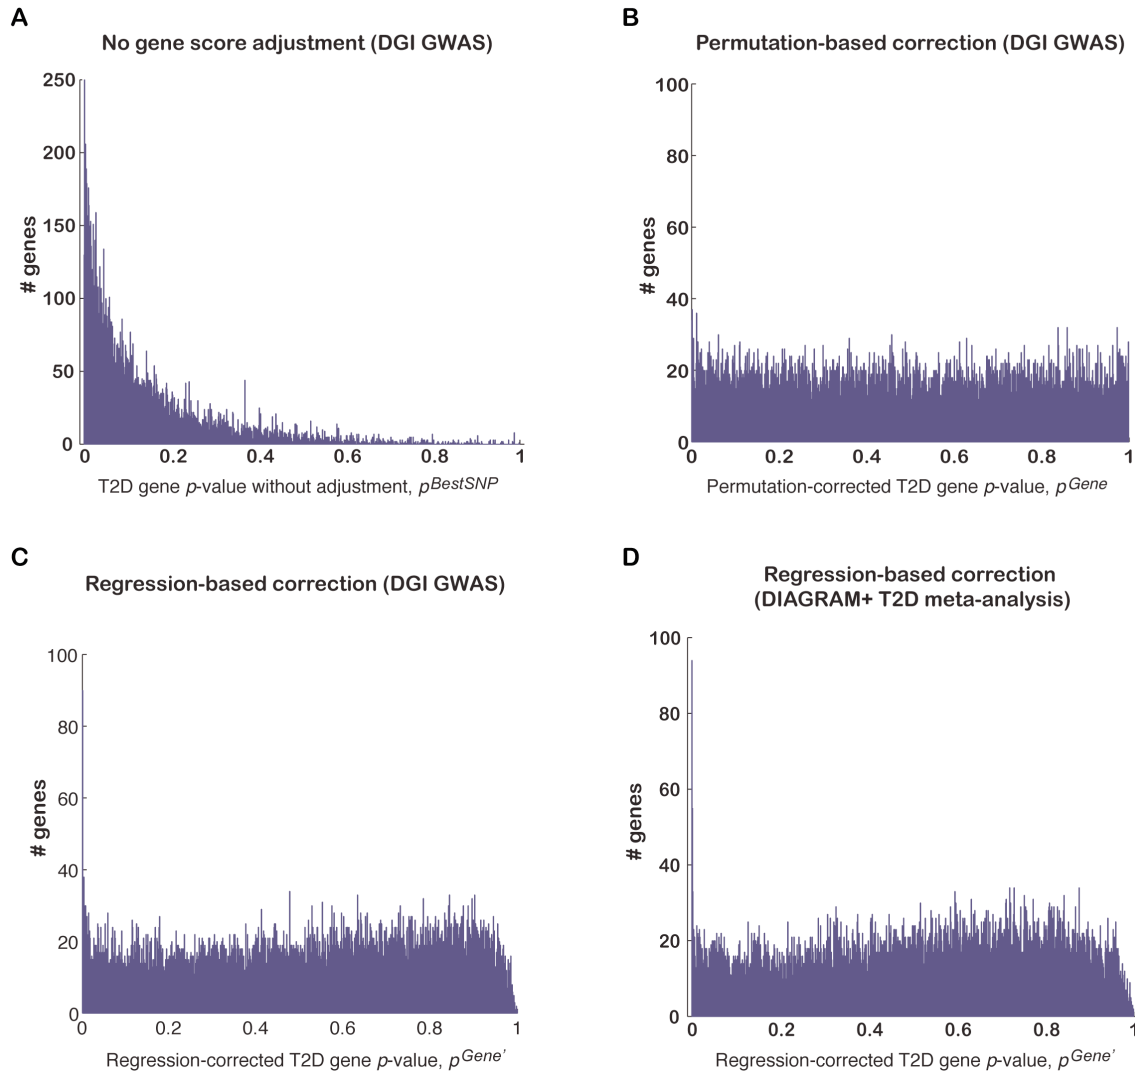

**Figure S8. Distribution of T2D gene association  $p$ -values following correction for confounders.** (A) The distribution of the unadjusted best SNP association  $p$ -value,  $P_g^{BestSNP}$  for all genes  $g$  in the genome is shown using the Diabetes Genetics Initiative (DGI) GWA study. Since the most significant SNP in a gene region was chosen for each gene the distribution is skewed towards low  $p$ -values. (B) The distribution of all DGI gene  $p$ -values following correction for confounders using phenotype permutation analysis ( $P_g^{Gene}$ ) demonstrates how the correction transforms  $P_g^{BestSNP}$  into a uniform distribution.

An excess of significant genes is seen at  $P_g^{Gene} < 0.001$ . (C) The distribution of all DGI gene  $p$ -values following correction using step-wise multivariate linear regression analysis ( $P_g^{Gene'}$ ) on the first four confounders listed in Table 1 is close to uniform, similar to  $P_g^{Gene}$  (in panel B). A slight deviation from uniformity is seen for  $P_g^{Gene'}$  at the less significant end of the  $p$ -values. An excess of significant genes is also observed at  $P_g^{Gene'} < 0.001$ . (D) The distribution of all gene  $p$ -values computed for the DIAGRAM+ T2D GWA meta-analysis, following step-wise linear regression of  $P_g^{BestSNP}$  against the first five confounders listed in Table 1 ( $P_g^{Gene'}$ ) transforms the skewed  $P_g^{BestSNP}$  distribution to a reasonably uniform one, similar to the DGI study. An excess of significant genes is also observed at  $P_g^{Gene'} < 0.001$ . A bin of 0.001 was used for all four plots.
