# Supplementary material for: Common Inherited Variation in Mitochondrial Genes Is Not Enriched for Associations with Type 2 Diabetes or Related Glycemic Traits
Source: PLOS journal article supplement (doi:10.1371/journal.pgen.1001058), 2010-08-12
Supplement: S14 (10.1371/journal.pgen.1001058.s014) [file journal.pgen.1001058.s014]

**Table S5. GSEA results for lipid and lipoprotein-related pathways using an LDL cholesterol GWA meta-analysis of 19,840 individuals.**

| Gene set                                               | # genes analyzed by GSEA | Nominal GSEA p-value | Observed # genes above 95 <sup>th</sup> percentile cutoff | Expected # genes above 95 <sup>th</sup> percentile cutoff | Genes near validated LDL cholesterol SNPs |
|--------------------------------------------------------|--------------------------|----------------------|-----------------------------------------------------------|-----------------------------------------------------------|-------------------------------------------|
| <b>PANTHER , Biological Process</b>                    |                          |                      |                                                           |                                                           |                                           |
| Fatty acid metabolism                                  | 88                       | 0.0120 (0.0112)      | 10                                                        | 4                                                         | -                                         |
| Lipid and fatty acid transport                         | 97                       | 0.0218 (0.0999)      | 10                                                        | 5                                                         | APOB, APOC1, APOC2, APOE                  |
| Acyl-CoA metabolism                                    | 17                       | 0.0500 (0.0494)      | 3                                                         | 1                                                         | -                                         |
| Other steroid metabolism                               | 10                       | 0.0922               | 2                                                         | 1                                                         | -                                         |
| Steroid metabolism                                     | 52                       | 0.2605               | 4                                                         | 3                                                         | -                                         |
| Lipid metabolism                                       | 129                      | 0.3101               | 8                                                         | 6                                                         | APOC2                                     |
| Cholesterol metabolism                                 | 60                       | 0.3581               | 4                                                         | 3                                                         | HMGCR                                     |
| Regulation of lipid, fatty acid and steroid metabolism | 26                       | 0.3852               | 2                                                         | 1                                                         | -                                         |
| Steroid hormone metabolism                             | 27                       | 0.3955               | 2                                                         | 1                                                         | -                                         |
| Phospholipid metabolism                                | 116                      | 0.5226               | 6                                                         | 6                                                         | -                                         |
| Lipid, fatty acid and steroid metabolism               | 37                       | 0.5592               | 2                                                         | 2                                                         | -                                         |
| Lipid and fatty acid binding                           | 16                       | 0.5621               | 1                                                         | 1                                                         | -                                         |
| Other lipid, fatty acid and steroid metabolism         | 25                       | 0.7179               | 1                                                         | 1                                                         | -                                         |
| Fatty acid beta-oxidation                              | 23                       | 1                    | 0                                                         | 1                                                         | -                                         |
| Fatty acid biosynthesis                                | 13                       | 1                    | 0                                                         | 1                                                         | -                                         |
| <b>Gene Ontology, Molecular Function</b>               |                          |                      |                                                           |                                                           |                                           |
| LIPID TRANSPORTER ACTIVITY                             | 27                       | 0.0090 (0.0352)      | 5                                                         | 1                                                         | APOC4                                     |
| LIPOPROTEIN BINDING                                    | 18                       | 0.0106 (0.0466)      | 4                                                         | 1                                                         | LDLR                                      |
| LOW DENSITY LIPOPROTEIN BINDING                        | 12                       | 0.0215 (0.1035)      | 3                                                         | 1                                                         | LDLR                                      |
| PHOSPHOLIPID BINDING                                   | 44                       | 0.0642               | 5                                                         | 2                                                         | APOE                                      |
| PHOSPHOLIPID TRANSPORTER ACTIVITY                      | 12                       | 0.1163               | 2                                                         | 1                                                         | -                                         |
| LIPID BINDING                                          | 80                       | 0.2129               | 6                                                         | 4                                                         | APOC2, APOE                               |
| STEROL BINDING                                         | 9                        | 0.3714               | 1                                                         | 0-1                                                       | -                                         |
| <b>Gene Ontology, Biological Process</b>               |                          |                      |                                                           |                                                           |                                           |
| LIPID TRANSPORT                                        | 27                       | 0.0001* (0.0352)     | 7                                                         | 1                                                         | APOE, LDLR                                |
| LIPID HOMEOSTASIS                                      | 14                       | 0.0005* (0.0204)     | 5                                                         | 1                                                         | APOE, PCSK9                               |
| LIPOPROTEIN METABOLIC PROCESS                          | 31                       | 0.0010* (0.0038)     | 7                                                         | 2                                                         | LDLR                                      |
| LIPID METABOLIC PROCESS                                | 291                      | 0.0013* (0.0046)     | 27                                                        | 15                                                        | APOC1, APOC2, APOC4, LDLR                 |
| FATTY ACID METABOLIC PROCESS                           | 58                       | 0.0019* (0.0024)     | 9                                                         | 3                                                         | -                                         |
| LIPID CATABOLIC PROCESS                                | 36                       | 0.0079 (0.0078)      | 6                                                         | 2                                                         | -                                         |
| REGULATION OF LIPID METABOLIC PROCESS                  | 11                       | 0.0140 (0.0143)      | 3                                                         | 1                                                         | -                                         |
| CELLULAR LIPID METABOLIC PROCESS                       | 231                      | 0.0201 (0.0355)      | 19                                                        | 12                                                        | APOC2                                     |
| FATTY ACID BIOSYNTHETIC PROCESS                        | 12                       | 0.0206 (0.0181)      | 3                                                         | 1                                                         | -                                         |
| FATTY ACID OXIDATION                                   | 18                       | 0.0554 (0.0572)      | 3                                                         | 1                                                         | -                                         |
| TRIACYLGLYCEROL METABOLIC PROCESS                      | 9                        | 0.0749               | 2                                                         | 0                                                         | APOC2                                     |
| FATTY ACID BETA OXIDATION                              | 11                       | 0.1004               | 2                                                         | 1                                                         | -                                         |
| PHOSPHOLIPID METABOLIC PROCESS                         | 70                       | 0.1298               | 6                                                         | 4                                                         | APOC2                                     |
| LIPID BIOSYNTHETIC PROCESS                             | 87                       | 0.1489               | 7                                                         | 4                                                         | -                                         |
| GLYCEROPHOSPHOLIPID METABOLIC PROCESS                  | 42                       | 0.1549               | 4                                                         | 2                                                         | -                                         |
| STEROID METABOLIC PROCESS                              | 65                       | 0.2221               | 5                                                         | 3                                                         | -                                         |
| CELLULAR LIPID CATABOLIC PROCESS                       | 33                       | 0.2230               | 3                                                         | 2                                                         | -                                         |
| STEROID BIOSYNTHETIC PROCESS                           | 20                       | 0.2639               | 2                                                         | 1                                                         | -                                         |
| PHOSPHOLIPID BIOSYNTHETIC PROCESS                      | 36                       | 0.2739               | 3                                                         | 2                                                         | -                                         |
| MEMBRANE LIPID METABOLIC PROCESS                       | 94                       | 0.3292               | 6                                                         | 5                                                         | APOC2                                     |
| LIPOPROTEIN BIOSYNTHETIC PROCESS                       | 24                       | 0.3417               | 2                                                         | 1                                                         | -                                         |
| GLYCEROPHOSPHOLIPID BIOSYNTHETIC PROCESS               | 27                       | 0.3931               | 2                                                         | 1                                                         | -                                         |
| MEMBRANE LIPID BIOSYNTHETIC PROCESS                    | 45                       | 0.3943               | 3                                                         | 2                                                         | -                                         |
| SPHINGOLIPID BIOSYNTHETIC PROCESS                      | 10                       | 0.3973               | 1                                                         | 1                                                         | -                                         |
| GLYCOSPHINGOLIPID METABOLIC PROCESS                    | 11                       | 0.4272               | 1                                                         | 1                                                         | -                                         |
| GLYCOLIPID METABOLIC PROCESS                           | 14                       | 0.5274               | 1                                                         | 1                                                         | -                                         |
| SPHINGOLIPID METABOLIC PROCESS                         | 28                       | 0.7668               | 1                                                         | 1                                                         | -                                         |
| BILE ACID METABOLIC PROCESS                            | 11                       | 1                    | 0                                                         | 1                                                         | -                                         |
| SPHINGOID METABOLIC PROCESS                            | 12                       | 1                    | 0                                                         | 1                                                         | -                                         |

A total of 51 (partially overlapping) gene sets related to lipid, lipoprotein and fatty acid metabolism taken from the PANTHER and Gene Ontology databases were tested with MAGENTA for enrichment of genetic associations to LDL cholesterol blood levels, using a GWA meta-analysis of 19,840 individuals (Kathiresan S. et al., 2009, Nature Genetics 41: 56-65). GSEA p-values that passed the Bonferroni significance threshold were marked with an asterisk (each database was corrected for multiple hypothesis testing separately due to considerable overlap between the gene sets from the different databases). The Bonferroni cutoffs for the different databases are: PANTHER (15 pathways):  $p < 0.0033$ , Gene Ontology, biological process terms (29 gene sets):  $p < 0.0017$ , and Gene Ontology, molecular function terms (7 gene sets):  $p < 0.0071$ . In the third column, GSEA p-values in parentheses are following exclusion of 19 genes that lie near 11 validated SNPs associated with LDL cholesterol (taken from Table 2 in Kathiresan S. et al., 2009). Interestingly, the association signals of some of the gene sets, including lipid and lipoprotein metabolism and lipid transport processes are still detectable when genes near validated SNPs are removed from the GSEA analysis. The 95th percentile of the adjusted LDL gene association p-values ( $p_{Gene}$ ) for all genes in the genome was used as the gene set enrichment cutoff.
