# Supplementary material for: Common Inherited Variation in Mitochondrial Genes Is Not Enriched for Associations with Type 2 Diabetes or Related Glycemic Traits
Source: PLOS journal article supplement (doi:10.1371/journal.pgen.1001058), 2010-08-12
Supplement: S15 (10.1371/journal.pgen.1001058.s015) [file journal.pgen.1001058.s015]

**Table S6. GSEA results for lipid and lipoprotein-related pathways using an HDL cholesterol GWA meta-analysis of 19,840 individuals.**

| Gene set                                               | # genes analyzed by GSEA | Nominal GSEA p-value | Observed # genes above 95 <sup>th</sup> percentile cutoff | Expected # genes above 95 <sup>th</sup> percentile cutoff | Genes near validated HDL cholesterol SNPs                                   |
|--------------------------------------------------------|--------------------------|----------------------|-----------------------------------------------------------|-----------------------------------------------------------|-----------------------------------------------------------------------------|
| <b>PANTHER , Biological Process</b>                    |                          |                      |                                                           |                                                           |                                                                             |
| Lipid and fatty acid transport                         | 99                       | 4e-5* (0.0162)       | 16                                                        | 5                                                         | ABCA1, APOA1, APOA4, APOC3, CETP, PLTP, APOA5                               |
| Regulation of lipid, fatty acid and steroid metabolism | 26                       | 0.1377               | 3                                                         | 1                                                         | APOC3                                                                       |
| Cholesterol metabolism                                 | 60                       | 0.1821               | 5                                                         | 3                                                         | ABCA1, CETP, LCAT, MVK                                                      |
| Lipid and fatty acid binding                           | 17                       | 0.2091               | 2                                                         | 1                                                         | -                                                                           |
| Acyl-CoA metabolism                                    | 18                       | 0.2191               | 2                                                         | 1                                                         | -                                                                           |
| Fatty acid beta-oxidation                              | 23                       | 0.3207               | 2                                                         | 1                                                         | -                                                                           |
| Steroid hormone metabolism                             | 24                       | 0.3361               | 2                                                         | 1                                                         | -                                                                           |
| Lipid metabolism                                       | 129                      | 0.4640               | 7                                                         | 6                                                         | LIPC, LIPG                                                                  |
| Phospholipid metabolism                                | 117                      | 0.5323               | 6                                                         | 6                                                         | ABCA1                                                                       |
| Fatty acid metabolism                                  | 85                       | 0.6237               | 4                                                         | 4                                                         | -                                                                           |
| Other lipid, fatty acid and steroid metabolism         | 25                       | 0.7224               | 1                                                         | 1                                                         | -                                                                           |
| Lipid, fatty acid and steroid metabolism               | 37                       | 0.8492               | 1                                                         | 2                                                         | -                                                                           |
| Steroid metabolism                                     | 52                       | 1                    | 0                                                         | 3                                                         | -                                                                           |
| Fatty acid biosynthesis                                | 13                       | 1                    | 0                                                         | 1                                                         | -                                                                           |
| Other steroid metabolism                               | 10                       | 1                    | 0                                                         | 1                                                         | -                                                                           |
| <b>Gene Ontology, Molecular Function</b>               |                          |                      |                                                           |                                                           |                                                                             |
| LIPID BINDING                                          | 79                       | 1.8e-5* (0.0036*)    | 14                                                        | 4                                                         | APOA1, APOA4, CETP, APOA5                                                   |
| PHOSPHOLIPID BINDING                                   | 43                       | 2.8e-5* (0.012)      | 10                                                        | 2                                                         | APOA1, APOA4, CETP, APOA5                                                   |
| STEROL BINDING                                         | 9                        | 0.0004* (0.0435)     | 4                                                         | 0                                                         | APOA1, CETP                                                                 |
| LIPID TRANSPORTER ACTIVITY                             | 27                       | 0.0426 (0.6953)      | 4                                                         | 1                                                         | ABCA1, APOA1, APOA4, CETP                                                   |
| LOW DENSITY LIPOPROTEIN BINDING                        | 12                       | 0.119                | 2                                                         | 1                                                         | APOA4                                                                       |
| LIPOPROTEIN BINDING                                    | 18                       | 0.2283               | 2                                                         | 1                                                         | APOA4                                                                       |
| PHOSPHOLIPID TRANSPORTER ACTIVITY                      | 12                       | 0.4637               | 1                                                         | 1                                                         | ABCA1, CETP                                                                 |
| <b>Gene Ontology, Biological Process</b>               |                          |                      |                                                           |                                                           |                                                                             |
| TRIACYLGLYCEROL METABOLIC PROCESS                      | 9                        | 1e-6* (8.3e-5*)      | 7                                                         | 0                                                         | APOC3, CETP, LPL, APOA5                                                     |
| LIPID TRANSPORT                                        | 27                       | 1e-6* (0.0023)       | 10                                                        | 1                                                         | ABCA1, APOA1, APOA4, APOC3, CETP, LCAT                                      |
| LIPID HOMEOSTASIS                                      | 14                       | 1e-5* (0.0012*)      | 8                                                         | 1                                                         | ABCA1, APOA1, APOA4, CETP, LCAT                                             |
| LIPID METABOLIC PROCESS                                | 287                      | 6e-5* (0.0179)       | 31                                                        | 14                                                        | APOA1, APOA4, APOA5, APOC3, CETP, HNF4A, LCAT, FADS1, FADS2, LPL, MVK, PLTP |
| CELLULAR LIPID METABOLIC PROCESS                       | 229                      | 0.0003* (0.0548)     | 24                                                        | 11                                                        | APOA1, APOC3, CETP, LCAT, FADS1, LPL                                        |
| LIPID CATABOLIC PROCESS                                | 36                       | 0.0006* (0.0068)     | 8                                                         | 2                                                         | APOA4, APOA5                                                                |
| CELLULAR LIPID CATABOLIC PROCESS                       | 33                       | 0.0050 (0.0206)      | 6                                                         | 2                                                         | APOA5                                                                       |
| LIPID BIOSYNTHETIC PROCESS                             | 87                       | 0.0110 (0.2327)      | 10                                                        | 4                                                         | APOA1, LCAT, FADS1, FADS2, MVK                                              |
| LIPOPROTEIN METABOLIC PROCESS                          | 31                       | 0.0170 (0.4202)      | 5                                                         | 2                                                         | APOA1, APOA4, CETP                                                          |
| PHOSPHOLIPID METABOLIC PROCESS                         | 70                       | 0.0234 (0.6511)      | 8                                                         | 4                                                         | APOA1, CETP, LCAT, FADS1, LPL                                               |
| MEMBRANE LIPID METABOLIC PROCESS                       | 93                       | 0.0412 (0.6551)      | 9                                                         | 5                                                         | APOA1, CETP, LCAT, FADS1, LPL                                               |
| STEROID METABOLIC PROCESS                              | 64                       | 0.0993               | 6                                                         | 3                                                         | -                                                                           |
| REGULATION OF LIPID METABOLIC PROCESS                  | 11                       | 0.1008               | 2                                                         | 1                                                         | APOA5                                                                       |
| PHOSPHOLIPID BIOSYNTHETIC PROCESS                      | 36                       | 0.1057               | 4                                                         | 2                                                         | APOA1, LCAT, FADS1                                                          |
| GLYCEROPHOSPHOLIPID BIOSYNTHETIC PROCESS               | 27                       | 0.1474               | 3                                                         | 1                                                         | APOA1, LCAT                                                                 |
| GLYCEROPHOSPHOLIPID METABOLIC PROCESS                  | 42                       | 0.1548               | 4                                                         | 2                                                         | APOA1, CETP, LCAT                                                           |
| FATTY ACID METABOLIC PROCESS                           | 57                       | 0.1566               | 5                                                         | 3                                                         | FADS1, FADS2                                                                |
| MEMBRANE LIPID BIOSYNTHETIC PROCESS                    | 45                       | 0.1845               | 4                                                         | 2                                                         | APOA1, LCAT, FADS1                                                          |
| STEROID BIOSYNTHETIC PROCESS                           | 20                       | 0.2638               | 2                                                         | 1                                                         | -                                                                           |
| SPHINGOLIPID METABOLIC PROCESS                         | 27                       | 0.3875               | 2                                                         | 1                                                         | -                                                                           |
| FATTY ACID BETA OXIDATION                              | 11                       | 0.4288               | 1                                                         | 1                                                         | -                                                                           |
| GLYCOSPHINGOLIPID METABOLIC PROCESS                    | 11                       | 0.4368               | 1                                                         | 1                                                         | -                                                                           |
| FATTY ACID BIOSYNTHETIC PROCESS                        | 12                       | 0.4589               | 1                                                         | 1                                                         | FADS1, FADS2                                                                |
| GLYCOLIPID METABOLIC PROCESS                           | 14                       | 0.5149               | 1                                                         | 1                                                         | -                                                                           |
| FATTY ACID OXIDATION                                   | 18                       | 0.5978               | 1                                                         | 1                                                         | -                                                                           |
| LIPOPROTEIN BIOSYNTHETIC PROCESS                       | 24                       | 0.7094               | 1                                                         | 1                                                         | APOA1                                                                       |
| SPHINGOID METABOLIC PROCESS                            | 12                       | 1                    | 0                                                         | 1                                                         | -                                                                           |
| SPHINGOLIPID BIOSYNTHETIC PROCESS                      | 10                       | 1                    | 0                                                         | 1                                                         | -                                                                           |
| BILE ACID METABOLIC PROCESS                            | 11                       | 1                    | 0                                                         | 1                                                         | -                                                                           |

A total of 51 (partially overlapping) gene sets related to lipid, lipoprotein and fatty acid metabolism taken from the PANTHER and Gene Ontology databases were tested with MAGENTA for enrichment of genetic associations to HDL cholesterol blood levels, using a GWA meta-analysis of 19,840 individuals (Kathiresan S. et al., 2009, Nature Genetics 41: 56-65). GSEA p-values that passed the Bonferroni significance threshold were marked with an asterisk (each database was corrected for multiple hypothesis testing separately due to considerable overlap between the gene sets from the different databases). The Bonferroni cutoffs for the different databases are: PANTHER (15 pathways): p<0.0033, Gene Ontology, biological process terms (29 gene sets): p<0.0017, and Gene Ontology, molecular function terms (7 gene sets): p<0.0071. In the third column, GSEA p-values in parentheses are following exclusion of 20 genes that lie near 14 validated SNPs associated with HDL cholesterol (taken from Table 2 in Kathiresan S. et al., 2009). Interestingly, the association signals of some of the gene sets, including lipid metabolism, binding and transport processes and triacylglycerol metabolism are still detectable when genes near validated HDL cholesterol SNPs are removed from the GSEA analysis. The 95th percentile of the adjusted HDL gene association p-values (pGene') for all genes in the genome was used as the gene set enrichment cutoff.
