# Supplementary material for: Common Inherited Variation in Mitochondrial Genes Is Not Enriched for Associations with Type 2 Diabetes or Related Glycemic Traits
Source: PLOS journal article supplement (doi:10.1371/journal.pgen.1001058), 2010-08-12
Supplement: S16 (10.1371/journal.pgen.1001058.s016) [file journal.pgen.1001058.s016]

**Table S7. GSEA results for lipid and lipoprotein-related pathways using triglyceride GWA meta-analysis of 19,840 individuals.**

| Gene set                                            | # genes analyzed in GSEA | Nominal GSEA p-value | Observed # genes above 95 <sup>th</sup> percentile cutoff | Expected # genes above 95 <sup>th</sup> percentile cutoff | Genes near validated triglyceride SNPs          |
|-----------------------------------------------------|--------------------------|----------------------|-----------------------------------------------------------|-----------------------------------------------------------|-------------------------------------------------|
| <b>PANTHER , Biological Process</b>                 |                          |                      |                                                           |                                                           |                                                 |
| Lipid and fatty acid transport                      | 97                       | 0.0490 (0.8446)      | 9                                                         | 5                                                         | APOA1, APOA4, APOB, APOC3, LPL, PLTP, APOA5     |
| Lipid metabolism                                    | 129                      | 0.0529 (0.0525)      | 11                                                        | 6                                                         | -                                               |
| Other steroid metabolism                            | 10                       | 0.0875               | 2                                                         | 1                                                         | -                                               |
| Fatty acid metabolism                               | 85                       | 0.2502               | 6                                                         | 4                                                         | -                                               |
| Cholesterol metabolism                              | 58                       | 0.3315               | 4                                                         | 3                                                         | -                                               |
| Regulation of lipid fatty acid & steroid metabolism | 26                       | 0.3847               | 2                                                         | 1                                                         | APOC3                                           |
| Fatty acid biosynthesis                             | 13                       | 0.5015               | 1                                                         | 1                                                         | -                                               |
| Acyl-CoA metabolism                                 | 18                       | 0.6045               | 1                                                         | 1                                                         | -                                               |
| Phospholipid metabolism                             | 116                      | 0.6891               | 5                                                         | 6                                                         | -                                               |
| Fatty acid beta-oxidation                           | 23                       | 0.6968               | 1                                                         | 1                                                         | -                                               |
| Other lipid, fatty acid and steroid metabolism      | 25                       | 0.7212               | 1                                                         | 1                                                         | -                                               |
| Lipid, fatty acid and steroid metabolism            | 37                       | 0.8456               | 1                                                         | 2                                                         | -                                               |
| Steroid metabolism                                  | 50                       | 0.9261               | 1                                                         | 3                                                         | -                                               |
| Lipid and fatty acid binding                        | 16                       | 1                    | 0                                                         | 1                                                         | -                                               |
| Steroid hormone metabolism                          | 25                       | 1                    | 0                                                         | 1                                                         | -                                               |
| <b>Gene Ontology, Molecular Function</b>            |                          |                      |                                                           |                                                           |                                                 |
| LIPID TRANSPORTER ACTIVITY                          | 25                       | 0.0012* (0.3238)     | 6                                                         | 1                                                         | APOA1, APOA4                                    |
| PHOSPHOLIPID BINDING                                | 44                       | 0.0202 (0.0548)      | 6                                                         | 2                                                         | APOA1, APOA4, APOA5                             |
| STEROL BINDING                                      | 9                        | 0.0752               | 2                                                         | 0-1                                                       | APOA1                                           |
| LIPID BINDING                                       | 80                       | 0.1039               | 7                                                         | 4                                                         | APOA1, APOA4, APOA5                             |
| PHOSPHOLIPID TRANSPORTER ACTIVITY                   | 12                       | 0.1143               | 2                                                         | 1                                                         | -                                               |
| LOW DENSITY LIPOPROTEIN BINDING                     | 12                       | 0.4555               | 1                                                         | 1                                                         | APOA4                                           |
| LIPOPROTEIN BINDING                                 | 18                       | 0.6065               | 1                                                         | 1                                                         | APOA4                                           |
| <b>Gene Ontology, Biological Process</b>            |                          |                      |                                                           |                                                           |                                                 |
| LIPID HOMEOSTASIS                                   | 14                       | 0.0001* (0.0974)     | 5                                                         | 1                                                         | APOA1, APOA4, ANGPTL3                           |
| TRIACYLGLYCEROL METABOLIC PROCESS                   | 9                        | 0.0008* (0.307)      | 4                                                         | 0-1                                                       | APOC3, LPL, APOA5                               |
| LIPID TRANSPORT                                     | 26                       | 0.0023 (0.3154)      | 6                                                         | 1                                                         | APOA1, APOC3, ANGPTL3, APOA4                    |
| LIPOPROTEIN METABOLIC PROCESS                       | 31                       | 0.0044 (0.4123)      | 6                                                         | 2                                                         | APOA1, APOA4, ANGPTL3                           |
| PHOSPHOLIPID METABOLIC PROCESS                      | 69                       | 0.0081 (0.0061)      | 9                                                         | 3                                                         | APOA1, FADS1, LPL                               |
| LIPID CATABOLIC PROCESS                             | 36                       | 0.0083 (0.0811)      | 6                                                         | 2                                                         | APOA4, APOA5, ANGPTL3                           |
| GLYCEROPHOSPHOLIPID METABOLIC PROCESS               | 42                       | 0.0149 (0.0036)      | 6                                                         | 2                                                         | APOA1                                           |
| MEMBRANE LIPID METABOLIC PROCESS                    | 93                       | 0.0185 (0.0056)      | 10                                                        | 5                                                         | APOA1, FADS1, LPL                               |
| PHOSPHOLIPID BIOSYNTHETIC PROCESS                   | 36                       | 0.0315 (0.007)       | 5                                                         | 2                                                         | APOA1, FADS1                                    |
| GLYCEROPHOSPHOLIPID BIOSYNTHETIC PROCESS            | 27                       | 0.0423 (0.0085)      | 4                                                         | 1                                                         | APOA1                                           |
| MEMBRANE LIPID BIOSYNTHETIC PROCESS                 | 45                       | 0.0703               | 5                                                         | 2                                                         | APOA1, FADS1                                    |
| CELLULAR LIPID CATABOLIC PROCESS                    | 33                       | 0.0803               | 4                                                         | 2                                                         | APOA5,                                          |
| REGULATION OF LIPID METABOLIC PROCESS               | 11                       | 0.1009               | 2                                                         | 1                                                         | APOA5, ANGPTL3                                  |
| CELLULAR LIPID METABOLIC PROCESS                    | 230                      | 0.1018               | 16                                                        | 12                                                        | APOA1, APOC3, ANGPTL3, APOA5, LPL, FADS1, FADS2 |
| LIPOPROTEIN BIOSYNTHETIC PROCESS                    | 24                       | 0.1129               | 3                                                         | 1                                                         | APOA1                                           |
| FATTY ACID BIOSYNTHETIC PROCESS                     | 12                       | 0.1255               | 2                                                         | 1                                                         | FADS1, FADS2                                    |
| LIPID BIOSYNTHETIC PROCESS                          | 87                       | 0.2671               | 6                                                         | 4                                                         | APOA1, FADS1, FADS2                             |
| FATTY ACID BETA OXIDATION                           | 11                       | 0.4232               | 1                                                         | 1                                                         | -                                               |
| FATTY ACID METABOLIC PROCESS                        | 57                       | 0.5517               | 3                                                         | 3                                                         | -                                               |
| FATTY ACID OXIDATION                                | 18                       | 0.5994               | 1                                                         | 1                                                         | -                                               |
| STEROID METABOLIC PROCESS                           | 63                       | 0.8365               | 2                                                         | 3                                                         | APOA1                                           |
| BILE ACID METABOLIC PROCESS                         | 11                       | 1                    | 0                                                         | 1                                                         | -                                               |
| GLYCOLIPID METABOLIC PROCESS                        | 14                       | 1                    | 0                                                         | 1                                                         | -                                               |
| GLYCOSPHINGOLIPID METABOLIC PROCESS                 | 11                       | 1                    | 0                                                         | 1                                                         | ANGPTL3, APOA5                                  |
| LIPID METABOLIC PROCESS                             | 14                       | 1                    | 0                                                         | 1                                                         | -                                               |
| SPHINGOID METABOLIC PROCESS                         | 12                       | 1                    | 0                                                         | 1                                                         | -                                               |
| SPHINGOLIPID BIOSYNTHETIC PROCESS                   | 10                       | 1                    | 0                                                         | 1                                                         | -                                               |
| SPHINGOLIPID METABOLIC PROCESS                      | 28                       | 1                    | 0                                                         | 1                                                         | -                                               |
| STEROID BIOSYNTHETIC PROCESS                        | 20                       | 1                    | 0                                                         | 1                                                         | -                                               |

A total of 51 (partially overlapping) gene sets related to lipid, lipoprotein and fatty acid metabolism taken from the PANTHER and Gene Ontology databases were tested with MAGENTA for enrichment of genetic associations to triglyceride blood levels, using a GWA meta-analysis of 19,840 individuals (Kathiresan S. et al., 2009, Nature Genetics 41: 56-65). GSEA p-values that passed the Bonferroni significance threshold were marked with an asterisk (each database was corrected for multiple hypothesis testing separately due to considerable overlap between the gene sets from the different databases). The Bonferroni cutoffs for the different databases are: PANTHER (15 pathways):  $p < 0.0033$ , Gene Ontology, biological process terms (29 gene sets):  $p < 0.0017$ , and Gene Ontology, molecular function terms (7 gene sets):  $p < 0.0071$ . In the third column, GSEA p-values in parentheses are following exclusion from the analysis of 19 genes that lie near 11 validated SNPs associated with triglyceride levels (taken from Table 2 in Kathiresan S. et al., 2009). Interestingly, the association signals of some of the gene sets, in particular phospholipid binding and metabolic processes are still detectable when genes near validated SNPs are removed from the GSEA analysis. The 95th percentile of the adjusted triglyceride gene association p-values (pGene') for all genes in the genome was used as the gene set enrichment cutoff.
